# Supplementary material for: Probing the relevance of MoO2 nanoparticles’ synthesis on their catalytic activity by inelastic neutron scattering
Source: Royal Society of Chemistry journal article supplement (doi:10.1039/c9cp06278e), 2019-12-04
Supplement: c9cp06278e1.pdf [file c9cp06278e1.pdf]

## Probing the Relevance of MoO<sub>2</sub> Nanoparticle Synthesis in Their Catalytic Activity by Inelastic Neutron Scattering

Carla D. Nunes,<sup>\*a</sup> Svemir Rudić,<sup>b</sup> Pedro D. Vaz,<sup>\*c,d</sup>

<sup>a</sup> Centro de Química e Bioquímica and Centro de Química Estrutural, Faculdade de Ciências, Universidade de Lisboa, 1749-016 Lisboa, Portugal.

<sup>b</sup>ISIS Neutron & Muon Source, Rutherford Appleton Laboratory, Chilton, Didcot, Oxfordshire OX11 0QX, United Kingdom

<sup>c</sup>CICECO – Aveiro Institute of Materials, Department of Chemistry, University of Aveiro, 3810-193 Aveiro, Portugal

<sup>d</sup>Champalimaud Foundation, Champalimaud Centre for the Unknown, 1400-038 Lisboa, Portugal

### *Supplementary Information*

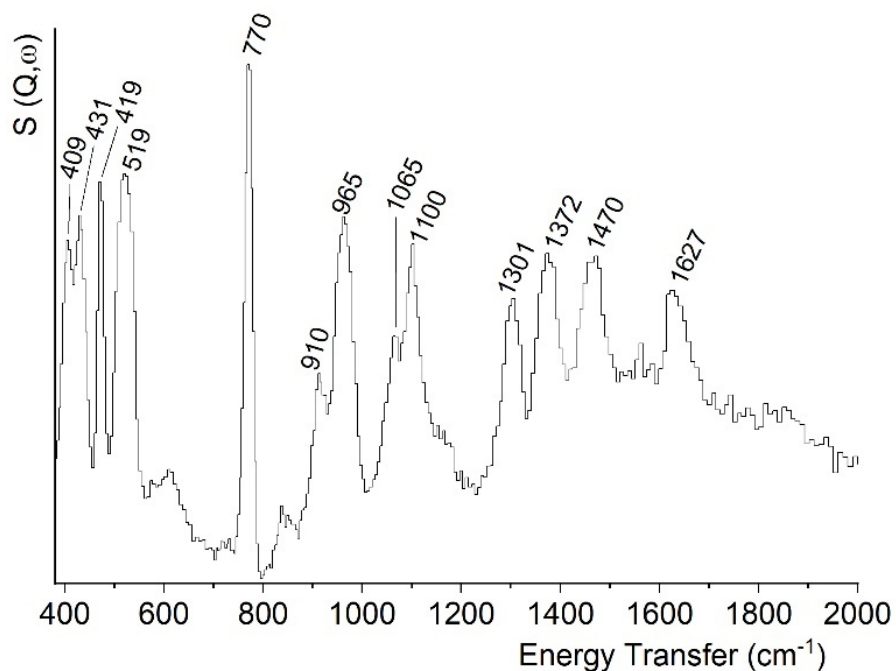

**Figure S1:** INS spectrum of neat ethylenediamine.

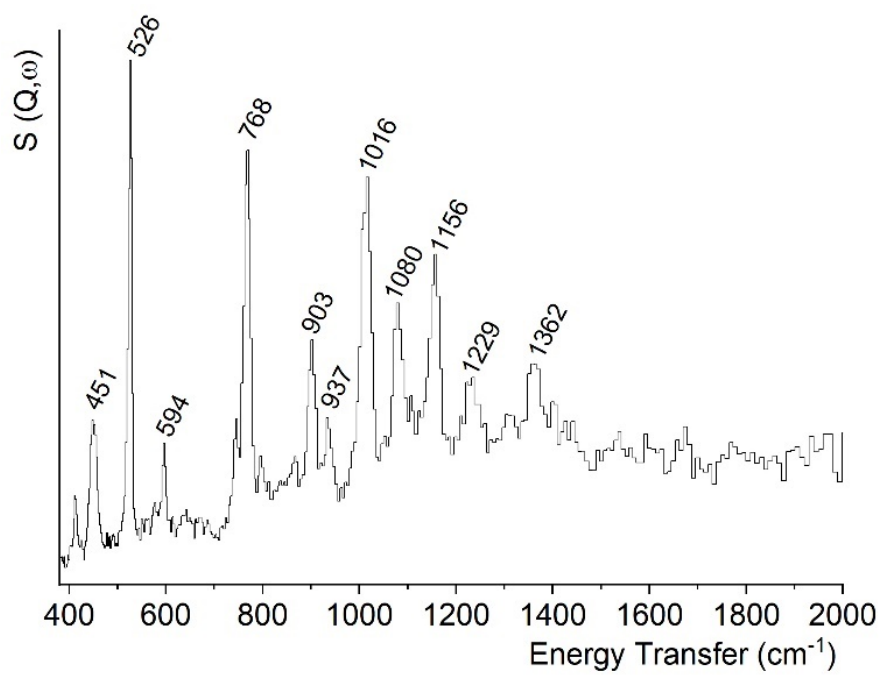

**Figure S2:** INS spectrum of neat *p*-benzoquinone.

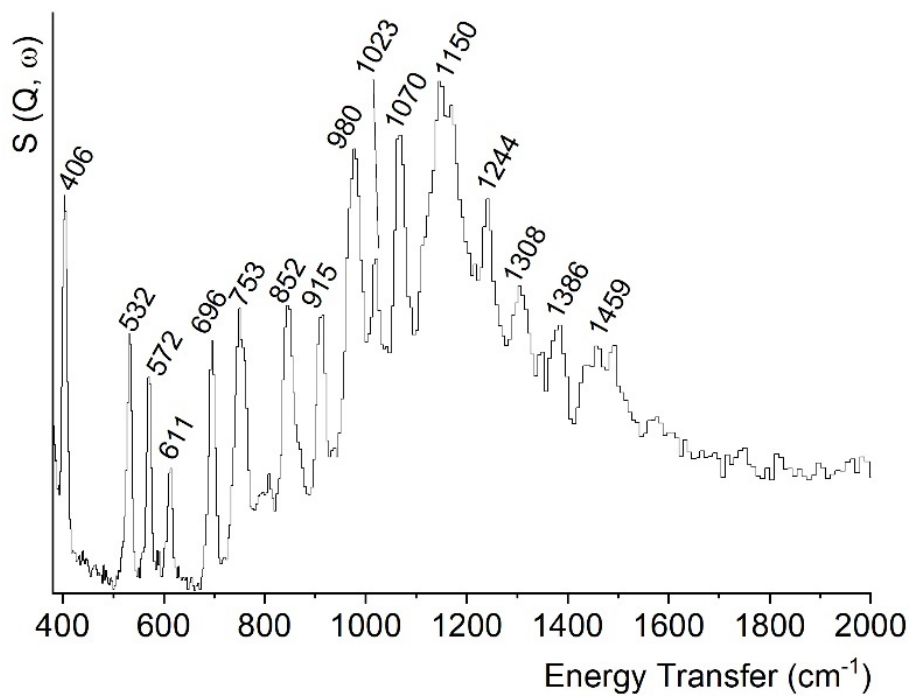

**Figure S3:** INS spectrum of neat styrene oxide.

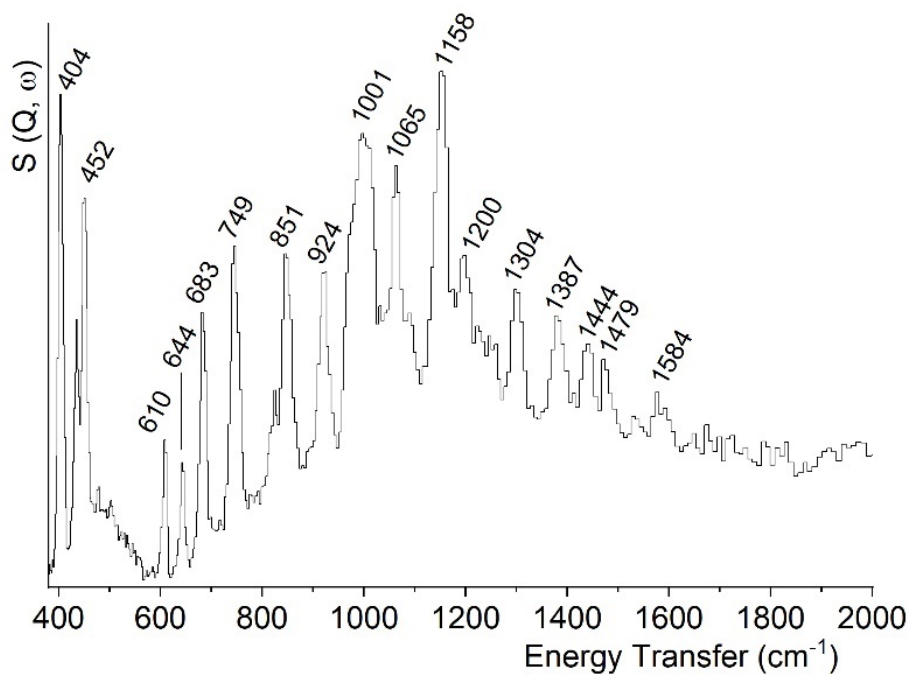

**Figure S4:** INS spectrum of neat benzaldehyde.

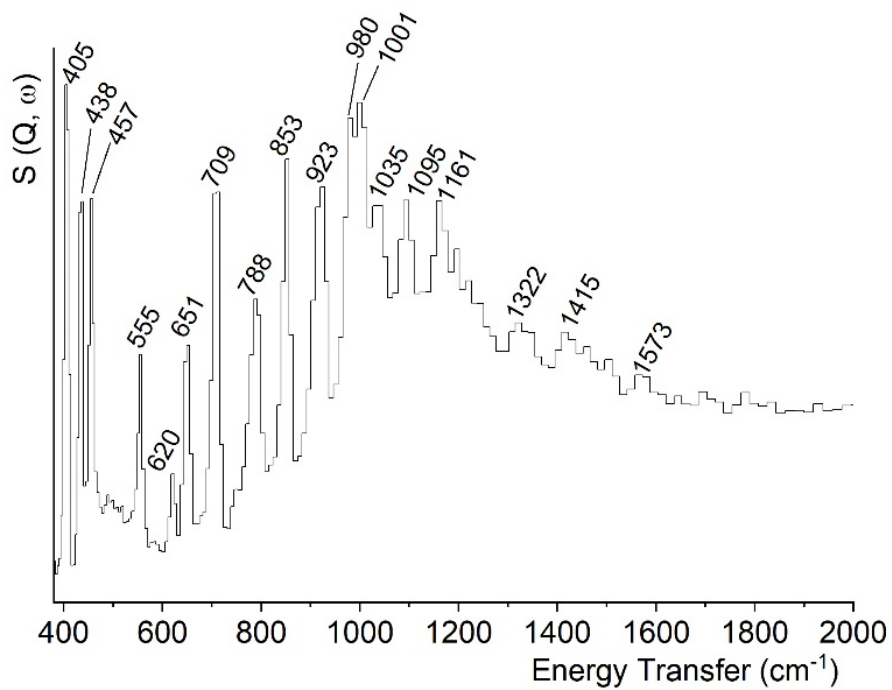

**Figure S5:** INS spectrum of neat styrene.

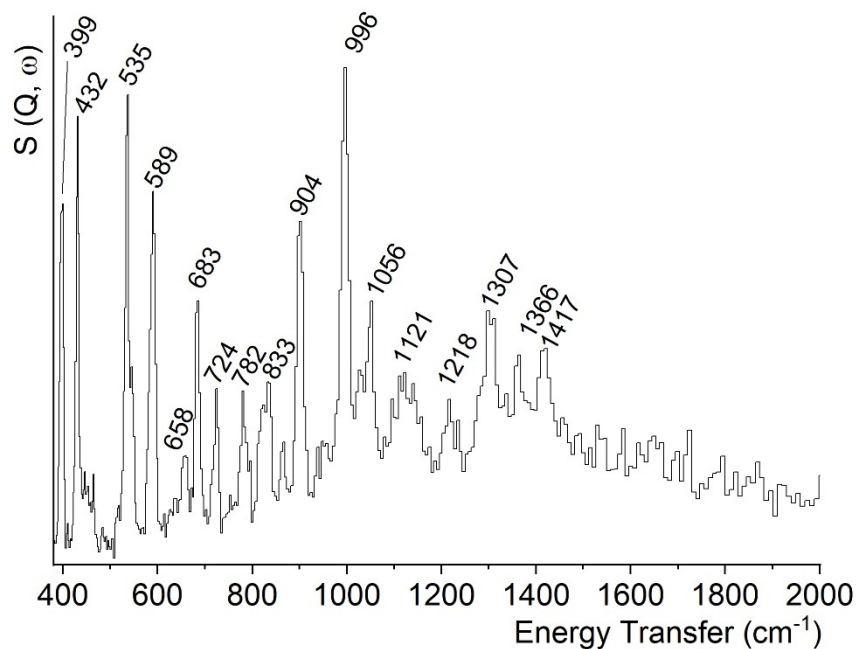

**Figure S6:** INS spectrum of neat styrene-d<sub>8</sub>.

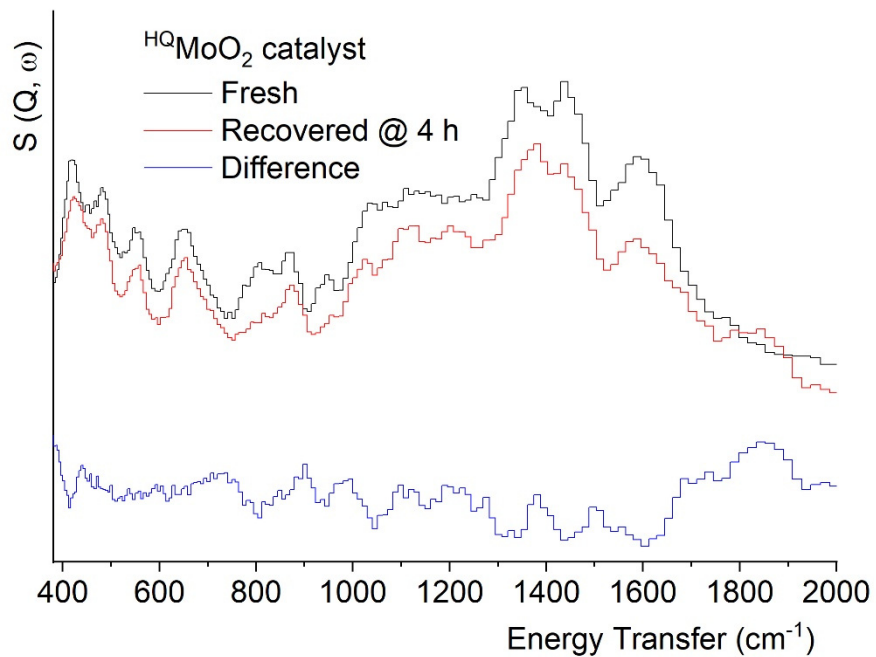

**Figure S7:** Comparison of the INS spectra between fresh (black) and recovered (red) HQMoO<sub>2</sub> catalyst. Also shown is the resulting difference spectrum. The spectra from the fresh and recovered catalyst were normalized for sample mass (see Experimental Section) and not offset vertically.
